# Supplementary material for: Prevalence, Virulence, and Antibiotics Gene Profiles in Lactococcus garvieae Isolated from Cows with Clinical Mastitis in China
Source: MDPI journal article supplement (doi:10.3390/microorganisms11020379), 2023-02-02
Supplement: s1 [file s1]

**Table S1.** 1441 milk samples collected from 84 herds in 5 regions of China.

| region                                       | Province                             | Herd                                 | Samples, n | Samples with confirmed <i>L. garvieae</i> |              |
|----------------------------------------------|--------------------------------------|--------------------------------------|------------|-------------------------------------------|--------------|
|                                              | confirmed with<br><i>L. garvieae</i> | confirmed with<br><i>L. garvieae</i> |            | By herd, n (%)                            | By region, % |
| Eastern China (5<br>provinces, 23<br>herds)  | Jiangsu                              | 8 <sup>th</sup>                      | 432        |                                           | 0.93         |
|                                              | Jiangsu                              | 9 <sup>th</sup>                      | 17         | 2, (11.76%)                               |              |
|                                              | Shandong                             | 21 <sup>th</sup>                     | 15         | 1, (6.67%)                                |              |
|                                              | Zhejiang                             | 23 <sup>th</sup>                     | 13         | 1, (7.69%)                                |              |
| Mid- China (3<br>provinces, 6<br>herds)      |                                      |                                      | 75         |                                           | 9.33         |
|                                              | Henan                                | 25 <sup>th</sup>                     | 23         | 2, (8.70%)                                |              |
|                                              | Shanxi                               | 28 <sup>th</sup>                     | 8          | 2, (25%)                                  |              |
| Northern China (6<br>provinces, 45<br>herds) | Shanxi                               | 29 <sup>th</sup>                     | 12         | 3, (25%)                                  | 0.20         |
|                                              | Hebei                                | 30 <sup>th</sup>                     | 17         | 1, (5.88%)                                |              |
| Southern China (3<br>provinces, 8<br>herds)  |                                      |                                      | 83         |                                           | 2.41         |
|                                              | Yunnan                               | 68 <sup>th</sup>                     | 11         | 2, (18.18%)                               |              |
| Western China (2<br>provinces, 16<br>herds)  |                                      |                                      | 358        |                                           | 9.50         |
|                                              | Gansu                                | 69 <sup>th</sup>                     | 17         | 1, (5.88%)                                |              |
|                                              | Ningxia                              | 72 <sup>th</sup>                     | 67         | 31, (46.27%)                              |              |
|                                              | Ningxia                              | 79 <sup>th</sup>                     | 26         | 1, (3.85%)                                |              |
| Total                                        | Ningxia                              | 80 <sup>th</sup>                     | 9          | 1, (11.11%)                               | 3.40         |
|                                              |                                      |                                      | 1441       | 49, (3.40%)                               |              |

**Table S2.** Biochemical results of 49 *L. garvieae* isolates.

| Isolates of <i>L. garvieae</i> | Ribose | sucrose | lactose | liquid gelatin | sorbitol | maltose | esculin, | VP | Galactose | trehalose | glucose |
|--------------------------------|--------|---------|---------|----------------|----------|---------|----------|----|-----------|-----------|---------|
| LG1                            | -      | -       | +       | -              | -        | +       | +        | -  | +         | +         | +       |
| LG2                            | -      | -       | +       | -              | -        | -       | +        | +  | +         | -         | -       |
| LG3                            | -      | -       | +       | -              | -        | +       | +        | +  | +         | +         | +       |
| LG4                            | -      | -       | +       | -              | -        | +       | +        | +  | +         | +         | +       |
| LG5                            | -      | -       | +       | -              | -        | +       | +        | +  | +         | +         | +       |
| LG6                            | -      | -       | +       | -              | -        | +       | +        | -  | +         | +         | +       |
| LG7                            | -      | -       | +       | -              | -        | +       | +        | +  | +         | +         | +       |
| LG8                            | -      | -       | +       | -              | -        | +       | +        | +  | +         | +         | +       |
| LG9                            | -      | -       | +       | -              | -        | +       | +        | -  | +         | +         | +       |
| LG10                           | -      | -       | +       | -              | -        | +       | +        | -  | -         | +         | +       |
| LG11                           | -      | -       | +       | -              | -        | +       | +        | +  | +         | +         | +       |
| LG12                           | -      | -       | -       | -              | -        | +       | -        | +  | +         | +         | -       |
| LG13                           | -      | -       | +       | -              | -        | +       | +        | -  | -         | +         | +       |
| LG14                           | -      | -       | +       | -              | -        | +       | +        | +  | +         | +         | +       |
| LG15                           | -      | -       | +       | -              | -        | -       | -        | +  | -         | -         | +       |
| LG16                           | -      | -       | +       | -              | -        | +       | -        | -  | -         | +         | +       |
| LG17                           | -      | -       | -       | -              | -        | +       | +        | +  | +         | +         | +       |
| LG18                           | -      | -       | +       | -              | -        | +       | +        | +  | +         | +         | +       |
| LG19                           | -      | -       | +       | -              | -        | +       | -        | +  | +         | +         | +       |
| LG20                           | -      | -       | +       | -              | -        | +       | +        | +  | +         | +         | +       |
| LG21                           | -      | -       | +       | -              | -        | +       | +        | +  | +         | +         | +       |
| LG22                           | -      | -       | +       | -              | -        | +       | +        | +  | +         | +         | +       |
| LG23                           | -      | -       | +       | -              | -        | +       | +        | +  | +         | +         | +       |
| LG24                           | -      | -       | +       | -              | -        | +       | +        | +  | +         | +         | +       |

|      |   |   |   |   |   |   |   |   |   |   |   |
|------|---|---|---|---|---|---|---|---|---|---|---|
| LG25 | - | - | + | - | - | + | + | + | + | + | + |
| LG26 | - | - | + | - | - | + | + | + | + | + | + |
| LG27 | - | - | + | - | - | + | + | + | + | + | + |
| LG28 | - | - | + | - | - | + | + | + | + | + | + |
| LG29 | - | - | + | - | - | + | + | + | + | + | + |
| LG30 | - | - | + | - | - | + | - | - | - | + | + |
| LG31 | - | - | + | - | - | + | + | + | + | + | + |
| LG32 | - | - | + | - | - | + | + | + | + | + | + |
| LG33 | - | - | + | - | - | + | + | + | + | + | + |
| LG34 | - | - | + | - | - | + | + | + | + | + | + |
| LG35 | - | - | + | - | - | + | + | + | + | + | + |
| LG36 | - | - | + | - | - | + | + | - | + | + | + |
| LG37 | - | - | + | - | - | + | + | + | - | + | + |
| LG38 | - | - | + | - | - | + | + | + | + | + | + |
| LG39 | - | - | + | - | - | + | + | + | + | + | + |
| LG40 | - | - | + | - | - | + | + | - | - | + | + |
| LG41 | - | - | + | - | - | + | - | - | - | + | + |
| LG42 | - | - | + | - | - | + | + | + | + | + | + |
| LG43 | - | - | + | - | - | + | + | + | + | + | + |
| LG44 | - | - | + | - | - | + | - | + | + | + | + |
| LG45 | - | - | + | - | - | + | - | + | + | + | + |
| LG46 | - | - | + | - | - | + | - | + | + | + | + |
| LG47 | - | - | + | - | - | + | - | + | + | + | + |
| LG48 | - | - | + | - | - | + | + | - | - | + | + |
| LG49 | - | - | + | - | - | + | + | + | + | + | + |

---

**Table S3.** Putative Virulence Gene Detection results of 49 *L. garvieae* isolates.

| Isolates of | hl | hl | hl | NA | S | p | P | Ps | e | L | L | L | L | A | A | A | 1020-  | 851-F, | 6329-  | 5358-  | C | E  | E  | E  | E  | E  | Es | Es | O  | R | 3 |
|-------------|----|----|----|----|---|---|---|----|---|---|---|---|---|---|---|---|--------|--------|--------|--------|---|----|----|----|----|----|----|----|----|---|---|
| L.          | y  | y  | y  | DH | O | g | a | a  | n | P | P | P | P | C | C | d | F,     | 1399-  | F,     | F,     | H | ps | ps | ps | ps | ps | p  | p  | R  | I | 0 |
| garvieae    | 1  | 2  | 3  | O  | D | m | v | A  | o | l | 2 | 3 | 4 | 1 | 2 | h | 1323-R | R      | 7175-R | 6007-R | P | A  | B  | C  | D  | L  | R  | X  | UP | F | S |
| LG1         | +  | +  | -  | +  | + | + | + | +  | + | - | - | - | - | + | + | - | -      | -      | +      | -      | + | +  | +  | +  | -  | +  | +  | +  | -  | - | + |
| LG2         | +  | +  | -  | +  | + | + | + | +  | + | - | - | - | - | + | + | - | -      | -      | +      | -      | + | +  | +  | +  | +  | +  | +  | +  | -  | + | + |
| LG3         | +  | +  | -  | +  | + | + | + | +  | + | - | - | - | - | + | + | - | -      | -      | -      | -      | + | +  | +  | +  | -  | +  | +  | +  | -  | + | + |
| LG4         | +  | +  | -  | +  | + | - | + | +  | + | - | - | - | - | + | + | - | -      | -      | -      | -      | + | +  | +  | +  | -  | +  | +  | +  | -  | - | + |
| LG5         | +  | +  | -  | +  | + | - | + | +  | + | - | - | - | - | + | + | - | -      | -      | +      | -      | + | +  | +  | +  | -  | +  | +  | +  | -  | - | + |
| LG6         | +  | +  | -  | +  | + | - | + | +  | + | - | - | - | - | + | + | - | -      | -      | -      | -      | + | +  | -  | +  | -  | +  | +  | +  | -  | - | + |
| LG7         | +  | +  | -  | +  | + | - | + | +  | + | - | - | - | - | + | + | - | -      | -      | -      | -      | + | +  | +  | +  | -  | +  | +  | +  | -  | + | + |
| LG8         | +  | +  | -  | +  | + | - | + | +  | + | - | - | - | - | + | + | - | -      | -      | +      | -      | + | +  | -  | +  | -  | +  | +  | +  | -  | - | + |
| LG9         | +  | +  | -  | +  | + | - | + | +  | + | - | - | - | - | + | + | - | -      | -      | -      | -      | + | +  | -  | +  | -  | +  | +  | +  | -  | - | + |
| LG10        | +  | +  | -  | +  | + | - | + | +  | + | - | - | - | - | + | + | - | -      | -      | -      | -      | + | +  | +  | +  | -  | -  | +  | +  | -  | - | + |
| LG11        | +  | +  | -  | +  | + | - | + | +  | + | - | - | - | - | + | + | - | -      | -      | -      | -      | + | +  | +  | +  | -  | -  | +  | +  | -  | + | + |
| LG12        | +  | +  | -  | +  | + | - | + | +  | + | - | - | - | - | + | + | - | -      | -      | +      | -      | + | +  | +  | +  | -  | +  | +  | +  | -  | + | + |
| LG13        | +  | +  | -  | +  | + | - | + | +  | + | - | - | - | - | + | + | - | -      | -      | -      | -      | + | +  | +  | +  | -  | +  | +  | +  | -  | + | + |
| LG14        | +  | +  | -  | +  | + | - | + | +  | + | - | - | + | - | + | + | - | +      | -      | +      | -      | + | +  | +  | +  | +  | +  | +  | +  | -  | - | + |
| LG15        | +  | +  | -  | +  | + | - | + | +  | + | - | - | - | - | + | + | - | -      | -      | -      | -      | + | +  | +  | +  | +  | +  | +  | +  | -  | - | + |
| LG16        | +  | +  | -  | +  | + | + | + | +  | + | - | - | - | - | + | + | - | -      | -      | +      | -      | + | +  | +  | +  | +  | +  | +  | +  | -  | - | + |
| LG17        | +  | +  | -  | +  | + | + | + | +  | + | - | - | - | - | + | + | - | -      | -      | +      | -      | + | +  | +  | +  | +  | +  | +  | +  | -  | + | + |
| LG18        | +  | +  | -  | +  | + | + | + | +  | + | - | - | - | - | + | + | - | -      | -      | -      | -      | + | +  | +  | +  | +  | +  | +  | +  | -  | + | + |
| LG19        | +  | +  | -  | +  | + | - | + | +  | + | - | - | - | - | + | + | - | -      | -      | -      | -      | + | +  | +  | +  | +  | -  | +  | +  | -  | + | + |
| LG20        | +  | +  | -  | +  | + | - | + | +  | + | - | - | - | - | + | + | - | -      | -      | -      | -      | + | +  | +  | +  | +  | +  | +  | +  | -  | + | + |
| LG21        | +  | +  | -  | +  | + | - | + | +  | + | - | - | - | - | + | + | - | -      | -      | -      | -      | + | +  | +  | +  | +  | +  | +  | +  | -  | - | + |
| LG22        | +  | +  | -  | +  | + | + | + | +  | + | - | - | - | - | + | + | - | -      | -      | -      | -      | + | +  | +  | +  | +  | +  | +  | +  | -  | - | + |

|      |   |   |   |   |   |   |   |   |   |   |   |   |   |   |   |   |   |   |   |   |   |   |   |   |   |   |   |   |   |   |
|------|---|---|---|---|---|---|---|---|---|---|---|---|---|---|---|---|---|---|---|---|---|---|---|---|---|---|---|---|---|---|
| LG23 | + | + | - | + | + | + | + | + | - | - | - | - | + | + | - | - | - | - | - | + | + | + | + | + | + | + | + | - | - | + |
| LG24 | + | + | - | + | + | + | + | + | - | - | - | - | + | + | - | - | - | - | - | + | + | + | + | + | + | + | + | - | - | + |
| LG25 | + | + | - | + | + | - | + | + | + | - | - | - | - | + | + | - | - | - | + | - | + | + | + | + | + | + | + | - | + | + |
| LG26 | + | + | - | + | + | - | + | + | + | - | - | - | - | + | + | - | - | - | - | + | + | + | + | + | + | + | + | - | - | + |
| LG27 | + | + | - | + | + | - | + | + | + | - | - | + | - | + | + | - | - | - | - | + | + | + | + | + | + | + | + | - | + | + |
| LG28 | + | + | - | + | + | - | + | + | + | - | - | + | - | + | + | - | - | - | - | + | + | + | + | + | + | + | + | - | + | + |
| LG29 | + | + | - | + | + | + | + | + | + | - | - | - | - | + | + | - | - | - | - | + | + | + | + | + | + | + | + | - | - | + |
| LG30 | + | + | - | + | + | - | + | + | + | - | - | - | - | + | + | - | - | - | - | + | + | + | + | + | + | + | + | - | + | + |
| LG31 | + | + | - | + | + | + | + | + | + | - | - | + | - | + | + | - | - | - | - | + | + | + | + | + | + | + | + | - | + | + |
| LG32 | + | + | - | + | + | + | + | + | + | - | - | + | - | + | + | - | - | - | - | + | + | + | + | + | + | + | + | - | + | + |
| LG33 | + | + | - | + | + | + | + | + | + | - | - | + | - | + | + | - | - | - | - | + | + | + | + | + | + | + | + | - | - | + |
| LG34 | + | + | - | + | + | - | + | + | + | - | - | + | - | + | + | - | - | - | - | + | + | + | + | + | + | + | + | - | - | + |
| LG35 | + | + | - | + | + | - | + | + | + | - | - | + | - | + | + | - | - | - | - | + | + | + | + | + | + | + | + | - | - | + |
| LG36 | + | + | - | + | + | - | + | + | + | - | - | - | - | + | + | - | - | - | - | + | + | + | + | - | + | + | + | - | - | + |
| LG37 | + | + | - | + | + | - | + | + | + | - | - | - | - | + | + | - | - | - | - | + | + | + | + | + | + | + | + | - | + | + |
| LG38 | + | + | - | + | + | - | + | + | + | - | - | + | - | + | + | - | - | - | - | + | + | + | + | + | + | + | + | - | + | + |
| LG39 | + | + | - | + | + | - | + | + | + | - | - | + | - | + | + | - | - | - | - | + | + | + | + | + | - | + | + | - | + | + |
| LG40 | + | + | - | + | + | - | + | + | + | - | - | - | - | + | + | - | - | - | - | + | + | + | + | + | - | + | + | - | + | + |
| LG41 | + | + | - | + | + | + | + | + | + | - | - | - | - | + | + | - | + | - | - | + | + | + | + | + | + | + | + | - | + | + |
| LG42 | + | - | - | + | + | - | + | + | + | - | - | - | - | + | + | - | - | - | - | + | + | + | + | + | + | + | + | - | + | + |
| LG43 | + | + | - | + | + | - | + | + | + | - | - | - | - | + | + | - | - | - | - | + | + | + | + | - | + | + | + | - | + | + |
| LG44 | + | + | - | + | + | - | + | + | + | - | - | + | - | + | + | - | - | - | - | + | + | + | + | + | + | + | + | - | + | + |
| LG45 | + | + | - | + | + | - | + | + | + | - | - | - | - | + | + | - | - | - | - | + | + | + | + | + | - | + | + | - | + | + |
| LG46 | + | + | - | + | + | - | + | + | + | - | - | - | - | + | + | - | - | - | - | + | + | + | + | + | + | + | + | - | + | + |
| LG47 | + | + | - | + | + | - | + | + | + | - | - | - | - | + | + | - | - | - | - | + | + | + | + | + | + | + | + | - | + | + |
| LG48 | + | + | - | + | + | - | + | + | + | - | - | - | - | + | + | - | - | - | - | + | + | + | + | + | - | + | + | - | + | + |

LG49

+ + - + + + + + + - - - - + + - - - + - + + + + + + + + + - + +

---
